# Supplementary material for: Efficient CO release from plasmonic Pt using 1D BiVO4@TiO2 heterojunctions for improved electrocatalytic and photoelectrocatalytic methanol oxidation
Source: Royal Society of Chemistry journal article supplement (doi:10.1039/d3nj04441f), 2024-01-01
Supplement: d3nj04441f1.pdf [file d3nj04441f1.pdf]

## Supporting Information

### Efficient CO-Release from the Plasmonic Pt Using 1D BiVO<sub>4</sub>@TiO<sub>2</sub> Heterojunction for Improved Electrocatalytic and Photoelectrocatalytic Methanol Oxidation

Hina Sajid<sup>a</sup>, Safdar Ali <sup>b</sup>, Jaweria Ambreen\* <sup>a,c</sup>, Uzma Naz <sup>a</sup>, Samiullah Khan<sup>d</sup>, Sayed Nauman Shah, <sup>b</sup>, Syafiqah Saidin <sup>c</sup>, Asad Mumtaz\*, <sup>b</sup>

<sup>a</sup> Department of Chemistry, COMSATS University Islamabad, Park Road, 45550, Islamabad Pakistan

<sup>b</sup> Department of Chemistry, School of Natural Sciences (SNS), National University of Sciences and Technology (NUST), Islamabad, H-12, 44000, Islamabad, Pakistan

<sup>c</sup> Dept. Of biomedical engineering & health sciences, Faculty of Electrical engineering, Universiti Teknologi Malaysia, 81310 UTM Johor Bahru, Johor, Malaysia

<sup>d</sup> Smart Surfaces and Materials Group, Functional Materials Lab, Department of Physics, Air University, PAF Complex, Air University, Islamabad, Pakistan

#### First Corresponding Author

Dr. Asad Mumtaz,

School of Natural Sciences (SNS),  
National University of Sciences & Technology (NUST), H-12, Islamabad, Pakistan  
**Mobile:** +923325190321 | **Office:** +92 51 90855593  
**E-mail:** asad.mumtaz@sns.nust.edu.pk

#### Second Corresponding Author

Dr. Jaweria Ambreen,  
jaweria.ambreen@comsats.edu.pk  
Department of Chemistry, COMSATS University Islamabad, Park Road, 45550, Islamabad Pakistan

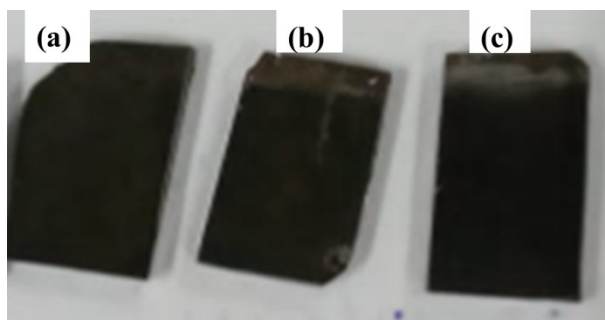

**Fig. S1** Optical micrographs of (a) 15-Pt/BiVO<sub>4</sub>/TiO<sub>2</sub>/FTO (a) 10-Pt/BiVO<sub>4</sub>/TiO<sub>2</sub>/FTO (a) 5-Pt/BiVO<sub>4</sub>/TiO<sub>2</sub>/FTO

## RESULTS AND DISCUSSION

In **Fig. S2**, Corresponding peaks of FTO (F, Sn, O), TiO<sub>2</sub> (Ti, O), BiVO<sub>4</sub> (Bi, V, O) and Pt are shown in EDX spectrum of FTO/ TiO<sub>2</sub> NRs /BiVO<sub>4</sub>/Pt with different cycles. The Atomic % of F, Sn, (FTO), Ti (TiO<sub>2</sub>), Bi, V, (BiVO<sub>4</sub>) and O (FTO, TiO<sub>2</sub> & BiVO<sub>4</sub>) are almost the same for all samples while Pt atomic% varies.

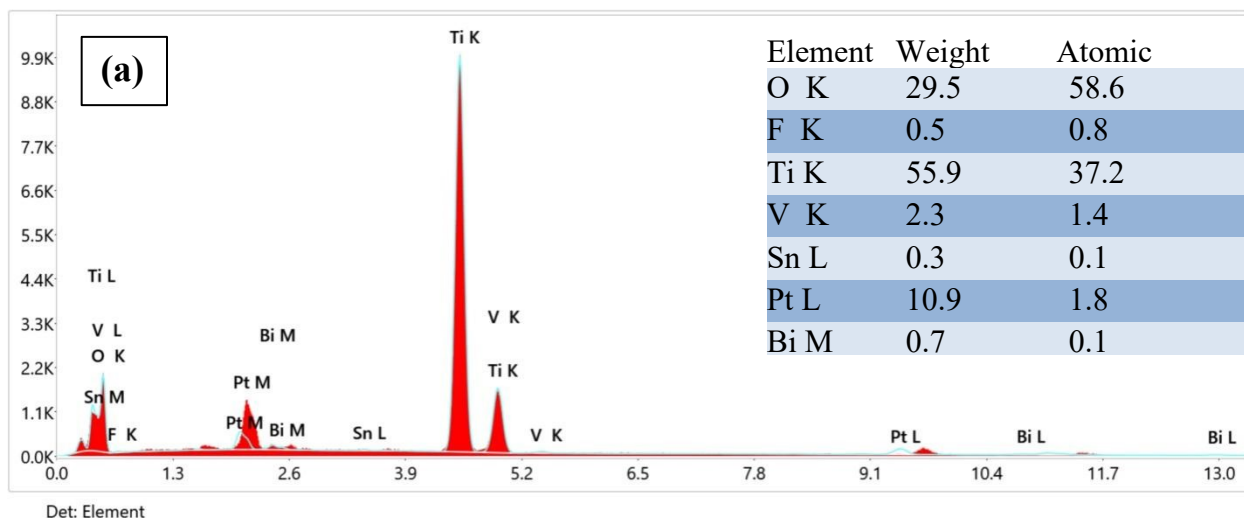

**Fig.S2** EDX analysis of Pt/BiVO<sub>4</sub>/TiO<sub>2</sub>/FTO (a) 5 cycles (b) 15 cycles

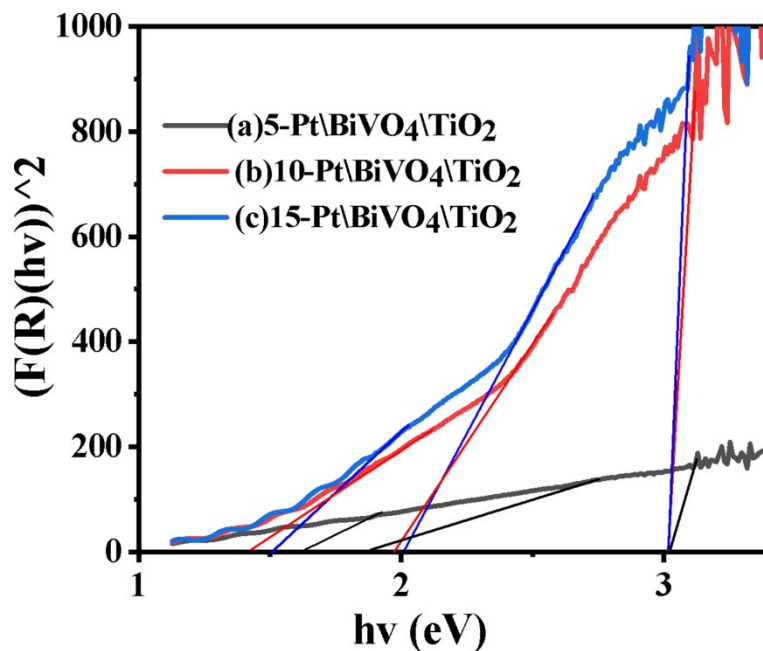

**Fig.S3** Tauc plot for Band Gap calculation of BiVO<sub>4</sub>/TiO<sub>2</sub>/FTO nanorods with different cycles of Pt.

GAMRY G3000 in Potentiostatic mode was utilized for conducting electrochemical studies. Firstly, response for Pt/BiVO<sub>4</sub>/TiO<sub>2</sub>/FTO nanorods electrode was recorded with 1M KOH. There is no oxidation and reduction peaks. Fig. S2 shows the response of Pt/BiVO<sub>4</sub>/TiO<sub>2</sub> electrode in KOH electrolyte.

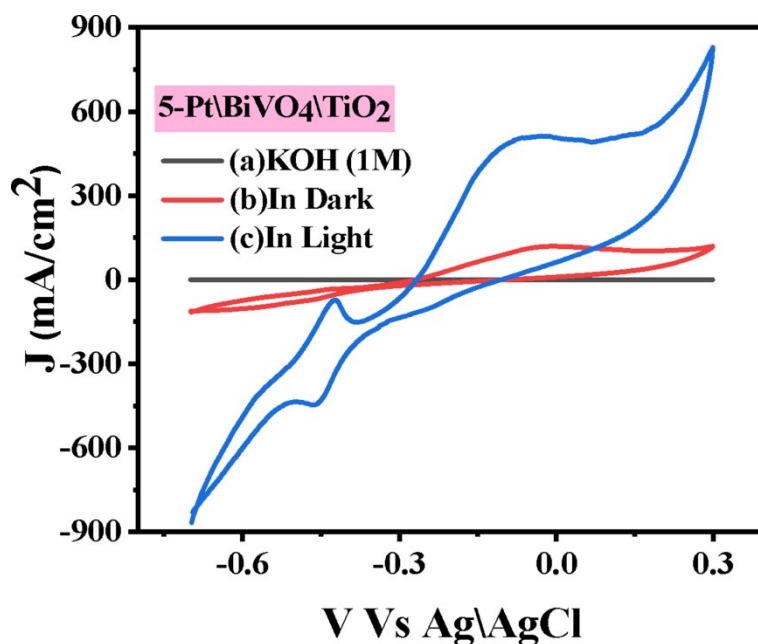

**Fig S4.** Cyclic Voltammogram of FTO/ TiO<sub>2</sub>NRs /BiVO<sub>4</sub>/Pt at scan rate 100 mV/s at 5 cycles of Pt.

The cyclic voltammetry of FTO/TiO<sub>2</sub>/BiVO<sub>4</sub>/Pt (5 and 15 Cycles) with different scan rates in 1 M methanol has been shown in the **Fig. S5**. As we know that when the scan rate increases from 20mV/s to 100mV/s, the current density is increased according to the reaction kinetics. Under dark the current density is 11.9 mA/cm<sup>2</sup> at -0.02 V and 28.0 mA/cm<sup>2</sup> at -0.13V as compared to light illumination 50.7 mA/cm<sup>2</sup> at -0.07 V and 47.0 mA/cm<sup>2</sup> at -0.12 V for FTO/TiO<sub>2</sub>/BiVO<sub>4</sub>/Pt 5 cycles and FTO/TiO<sub>2</sub>/BiVO<sub>4</sub>/Pt 15 cycles respectively, which is higher.

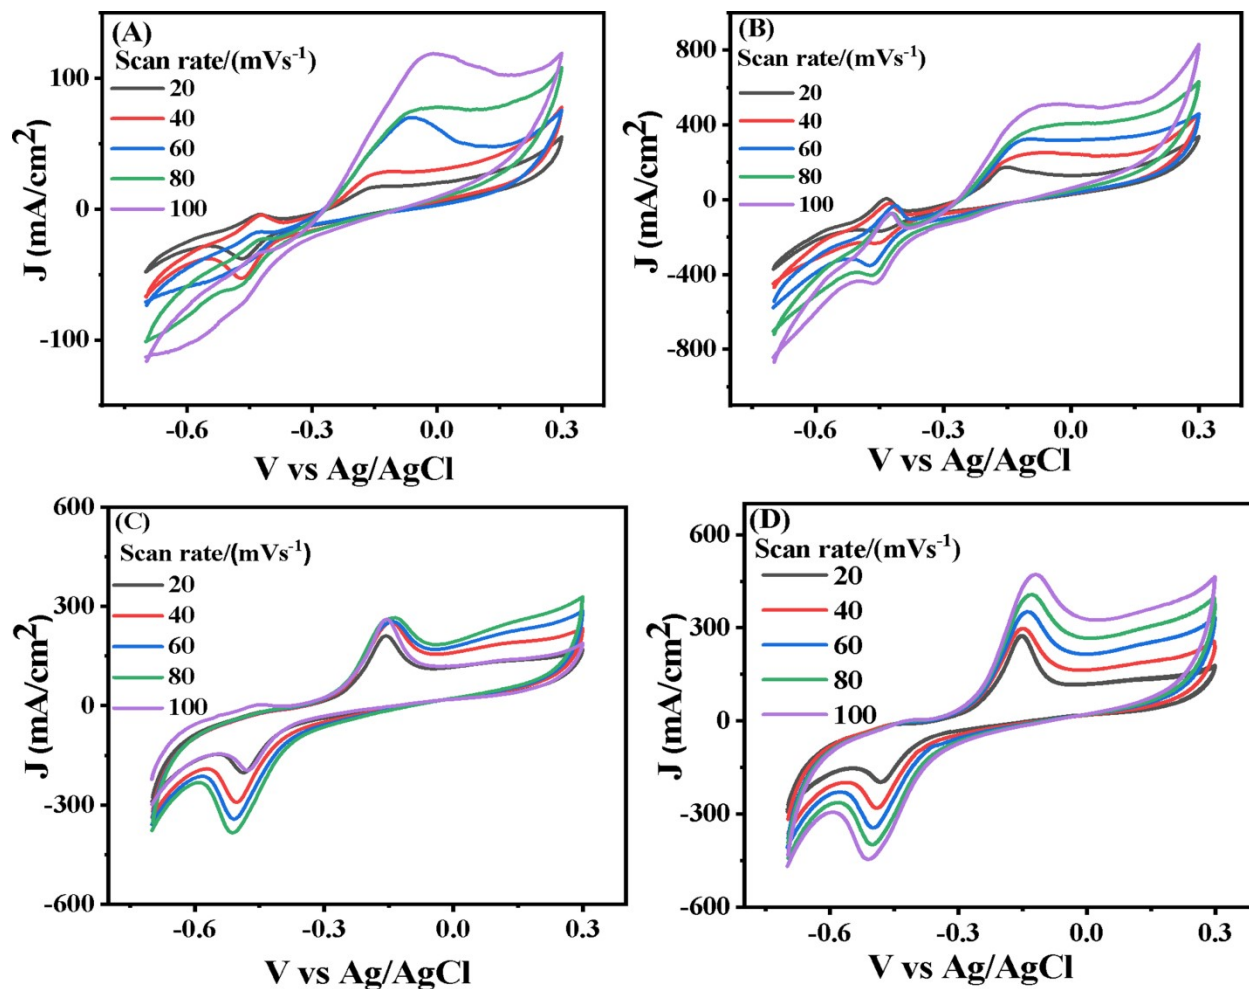

**Fig. S5** Cyclic Voltammogram of (A) FTO/ TiO<sub>2</sub>NRs /BiVO<sub>4</sub>/Pt with 5 Cycles in Dark (B) FTO/ TiO<sub>2</sub>NRs /BiVO<sub>4</sub>/Pt with 5 Cycles in Light (C) FTO/ TiO<sub>2</sub>NRs /BiVO<sub>4</sub>/Pt with 15 Cycles in Light (D) FTO/ TiO<sub>2</sub>NRs /BiVO<sub>4</sub>/Pt with 15 Cycles in dark

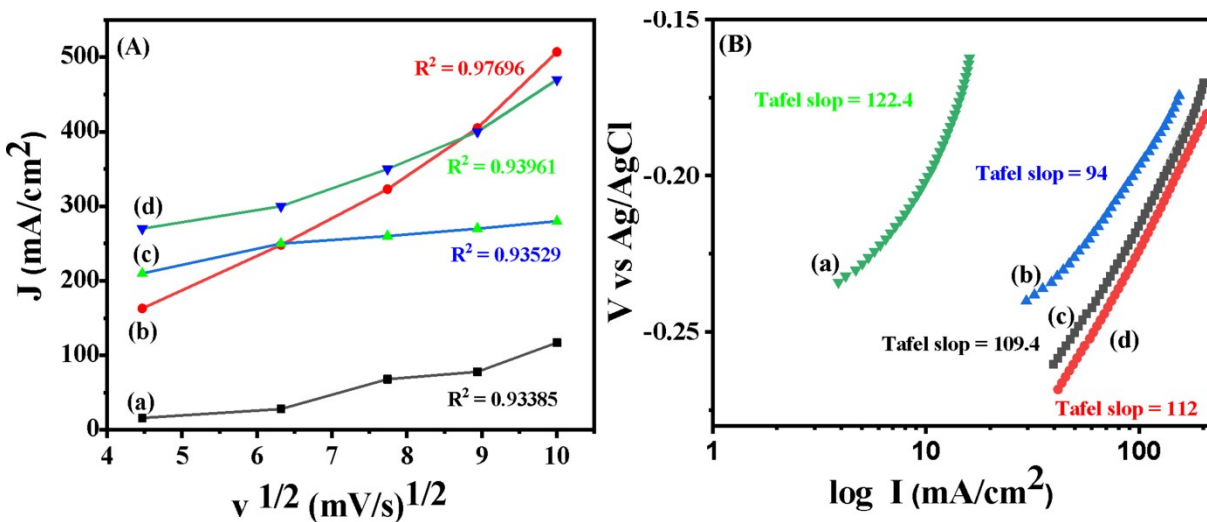

**Fig. S6.** (A) A graphical representation of the direct relationship of peak current density versus under root of scan rate ( $v$ ) in 1 M CH<sub>3</sub>OH & 1M KOH solution and (B) Tafel plots in 1M KOH & 1M CH<sub>3</sub>OH at 20 mV s<sup>-1</sup> scan rate for catalysts of (a)TiO<sub>2</sub>/BiVO<sub>4</sub>/Pt 5 cycles in Dark (b)TiO<sub>2</sub>/BiVO<sub>4</sub>/Pt 5 cycles in Light (c) TiO<sub>2</sub>/BiVO<sub>4</sub>/Pt 15 cycles in Dark (d) TiO<sub>2</sub>/BiVO<sub>4</sub>/Pt 15 cycles in Light
